# Supplementary material for: Predictive factors associated with the persistence of chest pain in post-laparoscopic myotomy and fundoplication in patients with achalasia
Source: PubMed Central journal article supplement (PMC9614071; doi:10.3389/fmed.2022.941581), 2022-10-14
Supplement: Table_1.pdf [file Table_1.pdf]

**Supplementary Table 1.** Characteristics of the study population according to chest pain at one-month post-surgery.

|                                         | <b>Total<br/>(n=119)</b>      | <b>W/o Chest<br/>Pain<br/>(n=69)</b> | <b>With Chest<br/>Pain<br/>(n=50)</b> | <b>P-value<br/>Total<br/>vs. w/o<br/>CP</b> | <b>P-<br/>value<br/>Total<br/>vs.<br/>w/CP</b> | <b>P-value<br/>w/o vs.<br/>w/CP</b> |
|-----------------------------------------|-------------------------------|--------------------------------------|---------------------------------------|---------------------------------------------|------------------------------------------------|-------------------------------------|
| <b>Demographics</b>                     |                               |                                      |                                       |                                             |                                                |                                     |
| Age (years), mean $\pm$ SD              | 40.7 $\pm$ 14.6 <sup>ps</sup> | 41.5 $\pm$                           | 39.5 $\pm$ 14.6 <sup>ps</sup>         | 0.710                                       |                                                |                                     |
| median                                  | 39.0                          | 14.6 <sup>ps</sup>                   | 38.0                                  |                                             |                                                |                                     |
| range                                   | 18 - 78                       | 40.0                                 | 18 - 78                               |                                             |                                                |                                     |
|                                         |                               | 18 - 70                              |                                       |                                             |                                                |                                     |
| Sex: female; n,<br>(%)/male; n, (%)     | 70 (59) / 49<br>(41)          | 39 (56) / 30<br>(43)                 | 31 (62) / 19<br>(38)                  | NS                                          | NS                                             | NS                                  |
| Ratio F/M                               | 1.43                          | 1.30                                 | 1.63                                  |                                             |                                                |                                     |
| <b>Clinical variables</b>               |                               |                                      |                                       |                                             |                                                |                                     |
| BMI (Kg/m <sup>2</sup> ), mean $\pm$ SD | 23.7 $\pm$ 4.8                | 23.6 $\pm$ 4.9                       | 23.9 $\pm$ 4.6                        | 0.950                                       |                                                |                                     |
| median                                  | 23.1                          | 23.5                                 | 22.2                                  |                                             |                                                |                                     |
| range                                   | 15.4 - 39.2                   | 15.4 - 39.2                          | 17.4 - 38.0                           |                                             |                                                |                                     |
| Overweight; n, (%)                      | 26 (22) <sup>ps</sup>         | 16 (23) <sup>ps</sup>                | 10 (20) <sup>ps</sup>                 | NS                                          | NS                                             | NS                                  |
| Obesity; n, (%)                         | 10 (8) <sup>ps</sup>          | 8 (12) <sup>ps</sup>                 | 2 (4) <sup>ps</sup>                   | NS                                          | NS                                             | NS                                  |
| Autoimmune disease; n, (%)              | 14 (12) <sup>ps</sup>         | 6 (9) <sup>ps</sup>                  | 8 (16) <sup>ps</sup>                  | NS                                          | NS                                             | NS                                  |
| Inflammatory diseases; n, (%)           | 20 (17) <sup>ps</sup>         | 10 (15) <sup>ps</sup>                | 10 (20) <sup>ps</sup>                 | NS                                          | NS                                             | NS                                  |
| <b>Type of Achalasia</b>                |                               |                                      |                                       |                                             |                                                |                                     |
| I; n, (%)                               | 41 (34)                       | 23 (33)                              | 18 (36)                               | NS                                          | NS                                             | NS                                  |
| II; n, (%)                              | 76 (64)                       | 44 (64)                              | 32 (64)                               | NS                                          | NS                                             | NS                                  |
| III; n, (%)                             | 2 (2)                         | 2 (3)                                | 0 (0)                                 | NS                                          | NS                                             | NS                                  |
| <b>Disease evolution (Months)</b>       |                               |                                      |                                       |                                             |                                                |                                     |
| mean $\pm$ SD                           | 26.0 $\pm$ 26.8 <sup>ps</sup> | 25.5 $\pm$ 27.0                      | 26.7 $\pm$ 26.9 <sup>ps</sup>         | 1.0                                         |                                                |                                     |
| median                                  | 16.0                          | <sup>ps</sup>                        | 18.0                                  |                                             |                                                |                                     |
| range                                   | 1 - 144                       | 14.0                                 | 2 - 115                               |                                             |                                                |                                     |
|                                         |                               | 1 - 144                              |                                       |                                             |                                                |                                     |
| <b>Symptoms</b>                         |                               |                                      |                                       |                                             |                                                |                                     |
| Chest pain; n, (%)                      | 50 (42)                       | 0 (0)                                | 50 (100)                              | <.00001                                     | NS                                             | <0.00001                            |
| Dysphagia; n, (%)                       | 49 (41)                       | 17 (25)                              | 32 (64)                               | 0.0265                                      | 0.0074                                         | <0.00001                            |
| Regurgitation; n, (%)                   | 23 (19)                       | 9 (13)                               | 14 (28)                               | NS                                          | NS                                             | NS                                  |
| <b>Questionnaires</b>                   |                               |                                      |                                       |                                             |                                                |                                     |
| Eckart (score), mean $\pm$ SD           | 1.9 $\pm$ 2.0                 | 1.2 $\pm$ 1.3                        | 3.0 $\pm$ 2.3                         | 0.007                                       | 0.001                                          | <0.001                              |
| median                                  | 1.5                           | 1.0                                  | 3.0                                   |                                             |                                                |                                     |
| range                                   | 0 - 12                        | 0 - 6                                | 0 - 12                                |                                             |                                                |                                     |
| GERD-HRQL (score), mean $\pm$<br>SD     | 4.3 $\pm$ 5.1<br>3.0          | 3.1 $\pm$ 4.5<br>2.0                 | 5.9 $\pm$ 5.4<br>4.5                  | NS                                          | NS                                             | 0.001                               |
| median                                  | 0 - 24                        | 0 - 22                               | 0 - 24                                |                                             |                                                |                                     |

|                                              |                              |                             |                         |           |    |        |  |
|----------------------------------------------|------------------------------|-----------------------------|-------------------------|-----------|----|--------|--|
|                                              | range                        |                             |                         |           |    |        |  |
| EAT-10 (score), mean ± SD                    | 3.6 ± 5.6                    | 2.1 ± 1.3                   | 5.6 ± 7.1               | NS        | NS | 0.004  |  |
|                                              | median                       | 2.0                         | 1.0                     | 3.0       |    |        |  |
|                                              | range                        | 0 - 35                      | 0 - 6                   | 0 - 35    |    |        |  |
| <b>Viral exanthemata's childhood disease</b> |                              |                             |                         |           |    |        |  |
| Chickenpox; n, (%)                           | 83 (70) <sup>ps</sup>        | 49 (71) <sup>ps</sup>       | 34 (68)                 | NS        | NS | NS     |  |
| Measles; n, (%)                              | 39 (33) <sup>ps</sup>        | 26 (38) <sup>ps</sup>       | 13 (26)                 | NS        | NS | NS     |  |
| Rubella; n, (%)                              | 11 (9) <sup>ps</sup>         | 7 (10) <sup>ps</sup>        | 4 (8)                   | NS        | NS | NS     |  |
| Hepatitis; n, (%)                            | 3 (3) <sup>ps</sup>          | 3 (4) <sup>ps</sup>         | 0 (0)                   | NS        | NS | NS     |  |
| Mumps; n, (%)                                | 11 (9) <sup>ps</sup>         | 8 (12) <sup>ps</sup>        | 3 (6)                   | NS        | NS | NS     |  |
| <b>Environmental exposure</b>                |                              |                             |                         |           |    |        |  |
| Tobacco exposure; n, (%)                     | 37 (31) <sup>ps</sup>        | 23 (33) <sup>ps</sup>       | 14 (28)                 | NS        | NS | NS     |  |
| Biomass exposure; n, (%)                     | 30 (25) <sup>ps</sup>        | 12 (17) <sup>ps</sup>       | 18 (36)                 | NS        | NS | 0.0316 |  |
| <b>Laboratory Data</b>                       |                              |                             |                         |           |    |        |  |
| Anti-nuclear antibodies; (%)                 | 37/103 (36)<br><sub>ps</sub> | 20/59 (34)<br><sub>ps</sub> | 17/44 (39)              | NS        | NS | NS     |  |
| Neutrophil to lymphocyte ratio mean±SD       | 2.2 ± 1.3 <sup>ps</sup>      | 2.0 ± 1.1 <sup>ps</sup>     | 2.4 ± 1.5 <sup>ps</sup> | 0.244     |    |        |  |
|                                              | median                       | 1.9                         | 1.8                     | 2.0       |    |        |  |
|                                              | range                        | 0.6 - 7.7                   | 0.6 - 5.2               | 1.0 - 7.7 |    |        |  |
| <b>Previous Treatments</b>                   |                              |                             |                         |           |    |        |  |
| Pneumatic dilation; n, (%)                   | 66 (56) <sup>ps</sup>        | 40 (58) <sup>ps</sup>       | 16 (32)                 | NS        | NS | NS     |  |
| Pneumatic dilation sessions, mean ± SD       | 1.3 ± 0.7 <sup>ps</sup>      | 1.3 ± 0.7 <sup>ps</sup>     | 1.3 ± 0.5 <sup>ps</sup> | NS        | NS | NS     |  |
|                                              | median                       | 1 - 3                       | 1 - 3                   | 1 - 2     |    |        |  |
|                                              | range                        |                             |                         |           |    |        |  |
| <b>Diagnostic studies</b>                    |                              |                             |                         |           |    |        |  |
| <b>Barium swallow</b>                        |                              |                             |                         |           |    |        |  |
| Esophageal dilatation (cm), mean ± SD        | 4.8 ± 1.6 <sup>ps</sup>      | 4.8 ± 1.7 <sup>ps</sup>     | 4.6 ± 1.5 <sup>ps</sup> | 0.843     |    |        |  |
|                                              | median                       | 4.6                         | 4.6                     | 4.8       |    |        |  |
|                                              | range                        | 0.0 - 10.5                  | 0.0 - 10.5              | 0.0 - 7.5 |    |        |  |
| Esophageal shape, n (%)                      |                              |                             |                         |           |    |        |  |
| Flask                                        | 81 (68) <sup>ps</sup>        | 47 (68) <sup>ps</sup>       | 34 (68) <sup>ps</sup>   | NS        | NS | NS     |  |
| Spindle                                      | 27 (23) <sup>ps</sup>        | 15 (22) <sup>ps</sup>       | 12 (24) <sup>ps</sup>   | NS        | NS | NS     |  |
| Sigmoid                                      | 11 (9) <sup>ps</sup>         | 7 (10) <sup>ps</sup>        | 4 (8) <sup>ps</sup>     | NS        | NS | NS     |  |
| Degree esophageal dilatation                 |                              |                             |                         |           |    |        |  |
| First degree <sup>†</sup> ; n, (%)           | 23 (19) <sup>ps</sup>        | 12(17) <sup>ps</sup>        | 11(22) <sup>ps</sup>    | NS        | NS | NS     |  |
| Second degree <sup>†</sup> ; n, (%)          | 59 (50) <sup>ps</sup>        | 33 (48) <sup>ps</sup>       | 26 (52) <sup>ps</sup>   | NS        | NS | NS     |  |
| Third degree <sup>†</sup> ; n, (%)           | 29 (24) <sup>ps</sup>        | 18 (26) <sup>ps</sup>       | 11 (22) <sup>ps</sup>   | NS        | NS | NS     |  |
| <b>High-Resolution Manometry</b>             |                              |                             |                         |           |    |        |  |

|                                                                  |                         |                        |                         |       |    |    |
|------------------------------------------------------------------|-------------------------|------------------------|-------------------------|-------|----|----|
| Basal LES pressure (mmHg),<br>mean $\pm$ SD                      | 11.7 $\pm$ 10.1<br>10.4 | 11.1 $\pm$ 8.3<br>10.1 | 12.5 $\pm$ 12.2<br>11.7 | 0.934 |    |    |
| median<br>range                                                  | 0.0 - 77.0              | 0.0 - 51.2             | 0.1 - 77.0              |       |    |    |
| Integrated relaxation<br>pressure (IRP) (mmHg), mean<br>$\pm$ SD | 7.9 $\pm$ 5.0<br>7.7    | 8.2 $\pm$ 5.7<br>7.8   | 7.5 $\pm$ 4.0<br>7.4    | 0.992 |    |    |
| median<br>range                                                  | 0.0 - 33.2              | 0.0 - 33.2             | 1.5 - 17.0              |       |    |    |
| IRP > 15 mmHg; n,<br>(%)                                         | 6 (5)                   | 5 (7)                  | 1 (2)                   | NS    | NS | NS |
| Amplitude distal<br>contractions,<br>mean $\pm$ SD               | 11.7 $\pm$ 20.7<br>0.0  | 11.8 $\pm$ 18.6<br>0.0 | 11.6 $\pm$ 23.8<br>0.0  | 0.860 |    |    |
| median<br>range                                                  | 0.0 - 126               | 0 - 84.1               | 0.0 - 126.0             |       |    |    |
| Distal contractile integral<br>(mmHg/s/cm), mean $\pm$ SD        | 141.6 $\pm$             | 158.7 $\pm$            | 116.6 $\pm$ 557.8       | 0.112 |    |    |
| median<br>range                                                  | 470.1<br>0.0 - 3528.0   | 404.3<br>0.0 -         | 0.0<br>0.0 - 3528.0     |       |    |    |
|                                                                  |                         | 2809.0                 |                         |       |    |    |

### Surgical data

#### Fundoplication technique

|                |         |         |         |    |    |    |
|----------------|---------|---------|---------|----|----|----|
| Dor; n, (%)    | 69 (63) | 36 (52) | 33 (66) | NS | NS | NS |
| Toupet; n, (%) | 56 (47) | 33 (48) | 23 (46) |    |    |    |

#### Intraoperative data

|                                                     |                      |                      |                      |    |    |    |
|-----------------------------------------------------|----------------------|----------------------|----------------------|----|----|----|
| Esophageal myotomy (cm),<br>mean $\pm$ SD           | 6.0 $\pm$ 0.7<br>6.0 | 6.0 $\pm$ 0.7<br>6.0 | 6.0 $\pm$ 0.7<br>6.0 | NS | NS | NS |
| median<br>range                                     | 4.0 - 7.0            | 4.0 - 7.0            | 4.0 - 7.0            |    |    |    |
| Gastric myotomy (cm), mean<br>$\pm$ SD              | 3.2 $\pm$ 0.5<br>3.0 | 3.2 $\pm$ 0.6<br>3.0 | 3.1 $\pm$ 0.3<br>3.0 |    |    |    |
| median<br>range                                     | 3.0 - 4.0            | 3.0 - 4.0            | 3.0 - 4.0            |    |    |    |
| Full myotomy length (cm),<br>mean $\pm$ SD          | 9.2 $\pm$ 0.8<br>9.0 | 9.1 $\pm$ 0.8<br>9.0 | 9.1 $\pm$ 0.7<br>9.0 | NS | NS | NS |
| median<br>range                                     | 7.0 - 12.0           | 7.0 - 12.0           | 7.0 - 11.0           |    |    |    |
| Dor Fundoplication length<br>(cm), mean $\pm$ SD    | 4.5 $\pm$ 0.6<br>4.0 | 4.5 $\pm$ 0.6<br>4.0 | 4.5 $\pm$ 0.6<br>4.5 |    |    |    |
| median<br>range                                     | 3.0 - 6.0            | 3.0 - 6.0            | 3.0 - 6.0            |    |    |    |
| Toupet Fundoplication<br>length (cm), mean $\pm$ SD | 4.2 $\pm$ 0.5<br>4.0 | 4.2 $\pm$ 0.5<br>4.0 | 4.2 $\pm$ 0.5<br>4.0 | NS | NS | NS |

|        |           |           |           |
|--------|-----------|-----------|-----------|
| median | 3.0 - 6.0 | 3.0 - 6.0 | 3.0 - 5.0 |
| range  |           |           |           |

---

Numbers may not sum to totals due to missing data, and column percentages may not sum to 100% due to rounding.

BMI: body mass index; cm: centimeter; DCI: distal; contractile integral; HRM: High-resolution manometry; IRP: Integrated relaxation pressure; Kg: kilogram; LES: Lower; esophageal sphincter; min: minute; mmHg: millimeters of mercury; NS: Not significant; ps: pre-surgery; s: second; SD: standard deviation; w/o: without, w/o CP: without chest pain; w/CP: with chest pain. †: First degree of dilatation (< 3.5 cm), second degree ( $\geq 3.5 < 6$  cm), third-degree ( $\geq 6$ ).

**Supplementary Table 2.** Characteristics of the study population according to chest pain at six-month post-surgery.

|                                     | <b>Total<br/>(n=91)</b> | <b>W/O<br/>Chest<br/>Pain<br/>(n=50)</b> | <b>With Chest<br/>Pain<br/>(n=41)</b> | <b>P-value<br/>Total vs.<br/>w/o CP</b> | <b>P-value<br/>Total vs.<br/>w/CP</b> | <b>P-value<br/>w/o vs.<br/>w/CP</b> |
|-------------------------------------|-------------------------|------------------------------------------|---------------------------------------|-----------------------------------------|---------------------------------------|-------------------------------------|
| <b>Demographics</b>                 |                         |                                          |                                       |                                         |                                       |                                     |
| Age (years), mean ± SD              | 40.7 ±                  | 39.0 ±                                   | 43.0 ±                                | 0.551                                   |                                       |                                     |
| median                              | 14.6 <sup>ps</sup>      | 14.4 <sup>ps</sup>                       | 15.1 <sup>ps</sup>                    |                                         |                                       |                                     |
| range                               | 39.0<br>18 - 78         | 39.0<br>18 - 68                          | 40.0<br>19 - 78                       |                                         |                                       |                                     |
| Sex: female; n, (%)/male; n,<br>(%) | 59 (65) / 32<br>(35)    | 29 (58) /<br>21 (42)                     | 30 (73) / 11<br>(27)                  |                                         |                                       |                                     |
| Ratio F/M                           | 1.84                    | 1.38                                     | 2.72                                  |                                         |                                       |                                     |
| <b>Clinical variables</b>           |                         |                                          |                                       |                                         |                                       |                                     |
| BMI (Kg/m <sup>2</sup> ), mean ± SD | 25.5 ± 4.8              | 25.8 ± 5.4                               | 25.3 ± 4.1                            | 0.997                                   |                                       |                                     |
| median                              | 25.3                    | 24.6                                     | 25.5                                  |                                         |                                       |                                     |
| range                               | 17.6 - 43.5             | 19.0 - 43.5                              | 17.6 - 34.5                           |                                         |                                       |                                     |
| Overweight; n, (%)                  | 20 (22)                 | 9 (18)                                   | 11 (27)                               | NS                                      | NS                                    | NS                                  |
| Obesity; n, (%)                     | 8 (9)                   | 5 (10)                                   | 3 (7)                                 | NS                                      | NS                                    | NS                                  |
| Autoimmune disease; n, (%)          | 7 (8) <sup>ps</sup>     | 2 (4) <sup>ps</sup>                      | 5 (12) <sup>ps</sup>                  | NS                                      | NS                                    | NS                                  |
| Inflammatory diseases; n, (%)       | 16 (18) <sup>ps</sup>   | 6 (12) <sup>ps</sup>                     | 10 (24) <sup>ps</sup>                 | NS                                      | NS                                    | NS                                  |
| <b>Type of Achalasia</b>            |                         |                                          |                                       |                                         |                                       |                                     |
| I; n, (%)                           | 23 (25)                 | 11 (22)                                  | 12 (29)                               | NS                                      | NS                                    | NS                                  |
| II; n, (%)                          | 66 (73)                 | 37 (74)                                  | 29 (71)                               | NS                                      | NS                                    | NS                                  |
| III; n, (%)                         | 2 (2)                   | 2 (4)                                    | 0 (0)                                 | NS                                      | NS                                    | NS                                  |
| <b>Disease evolution (Months)</b>   |                         |                                          |                                       |                                         |                                       |                                     |
| mean ± SD                           | 24.7 ± 24.1             | 23.9 ±                                   | 25.7 ± 23.7                           | 0.806                                   |                                       |                                     |
| median                              | <sup>ps</sup>           | 24.6 <sup>ps</sup>                       | <sup>ps</sup>                         |                                         |                                       |                                     |
| range                               | 15.5<br>1 - 108         | 13.5<br>1 - 108                          | 17.0<br>2 - 91                        |                                         |                                       |                                     |
| <b>Symptoms</b>                     |                         |                                          |                                       |                                         |                                       |                                     |
| Chest pain; n, (%)                  | 41 (45)                 | 0 (0)                                    | 41 (100)                              | <0.00001                                | <0.00001                              | <0.00001                            |
| Dysphagia; n, (%)                   | 50 (55)                 | 23 (46)                                  | 27 (66)                               | 0.3789                                  | 0.2587                                | 0.0897                              |
| <b>Questionnaires</b>               |                         |                                          |                                       |                                         |                                       |                                     |
| Eckart (score), mean ± SD           | 1.8 ± 1.8               | 1.1 ± 1.5                                | 2.8 ± 1.8                             | <0.050                                  | <0.050                                | <0.001                              |
| median                              | 1.0                     | 1.0                                      | 2.0                                   |                                         |                                       |                                     |
| range                               | 0 - 9                   | 0 - 8                                    | 0 - 9                                 |                                         |                                       |                                     |
| GERD-HRQL (score), mean ± SD        | 5.0 ± 6.0               | 3.3 ± 3.1                                | 7.1 ± 7.9                             | 0.071                                   |                                       |                                     |
| median                              | 3.0                     | 2.5                                      | 4.0                                   |                                         |                                       |                                     |
| range                               | 0.0 - 33.0              | 0.0 - 13.0                               | 0.0 - 33.0                            |                                         |                                       |                                     |
| EAT-10 (score), mean ± SD           | 3.2 ± 5.5               | 1.3 ± 2.2                                | 5.6 ± 7.2                             | NS                                      | NS                                    | 0.002                               |
| median                              | 1.0                     | 1.0                                      | 4.0                                   |                                         |                                       |                                     |

|                                                        | range                    | 0.0 - 36.0               | 0.0 - 11.0               | 0.0 - 36.0 |    |    |  |
|--------------------------------------------------------|--------------------------|--------------------------|--------------------------|------------|----|----|--|
| <b>Viral exanthemata's childhood disease</b>           |                          |                          |                          |            |    |    |  |
| Chickenpox; n, (%)                                     | 69 (76) <sup>ps</sup>    | 39 (78) <sup>ps</sup>    | 30 (73) <sup>ps</sup>    | NS         | NS | NS |  |
| Measles; n, (%)                                        | 33 (36) <sup>ps</sup>    | 16 (32) <sup>ps</sup>    | 17 (41) <sup>ps</sup>    | NS         | NS | NS |  |
| Rubella; n, (%)                                        | 8 (9) <sup>ps</sup>      | 3 (6) <sup>ps</sup>      | 5 (12) <sup>ps</sup>     | NS         | NS | NS |  |
| Hepatitis; n, (%)                                      | 2 (2) <sup>ps</sup>      | 1 (2) <sup>ps</sup>      | 1 (2) <sup>ps</sup>      | NS         | NS | NS |  |
| Mumps; n, (%)                                          | 10 (1) <sup>ps</sup>     | 7 (14) <sup>ps</sup>     | 3 (7) <sup>ps</sup>      | NS         | NS | NS |  |
| <b>Environmental exposure</b>                          |                          |                          |                          |            |    |    |  |
| Tobacco exposure; n, (%)                               | 30 (33) <sup>ps</sup>    | 21 (42) <sup>ps</sup>    | 11 (27) <sup>ps</sup>    | NS         | NS | NS |  |
| Biomass exposure; n, (%)                               | 23 (25) <sup>ps</sup>    | 12 (24) <sup>ps</sup>    | 11 (27) <sup>ps</sup>    | NS         | NS | NS |  |
| <b>Laboratory Data</b>                                 |                          |                          |                          |            |    |    |  |
| Anti-nuclear antibodies; (%)                           | 31/83 (37) <sup>ps</sup> | 19/43 (44) <sup>ps</sup> | 12/39 (31) <sup>ps</sup> | NS         | NS | NS |  |
| Neutrophil to lymphocyte ratio                         | 2.3 ± 1.3 <sup>ps</sup>  | 2.2 ± 1.4 <sup>ps</sup>  | 2.3 ± 1.3 <sup>ps</sup>  | 0.995      |    |    |  |
| mean ± SD                                              | 2.0                      | 2.0                      | 2.0                      |            |    |    |  |
| median                                                 | 0.6 - 7.7                | 0.6 - 7.7                | 0.6 - 7.1                |            |    |    |  |
| range                                                  |                          |                          |                          |            |    |    |  |
| <b>Previous Treatments</b>                             |                          |                          |                          |            |    |    |  |
| Pneumatic dilation; n, (%)                             | 56 (62) <sup>ps</sup>    | 29 (58) <sup>ps</sup>    | 27 (67) <sup>ps</sup>    | NS         | NS | NS |  |
| Pneumatic dilation sessions,                           | 1.2 ± 0.5 <sup>ps</sup>  | 1.3 ± 0.6 <sup>ps</sup>  | 1.0 ± 0.0 <sup>ps</sup>  | NS         | NS | NS |  |
| mean ± SD                                              | 1.0                      | 1.0                      | 1.0                      |            |    |    |  |
| median                                                 | 1 - 3                    | 1 - 3                    | 1 - 1                    |            |    |    |  |
| range                                                  |                          |                          |                          |            |    |    |  |
| <b>Diagnostic studies</b>                              |                          |                          |                          |            |    |    |  |
| <b>Barium swallow</b>                                  |                          |                          |                          |            |    |    |  |
| Esophageal dilatation (cm), mean                       | 4.6 ± 1.6 <sup>ps</sup>  | 4.8 ± 1.6 <sup>ps</sup>  | 4.3 ± 1.5 <sup>ps</sup>  | 0.707      |    |    |  |
| ± SD                                                   | 4.5                      | 4.4                      | 4.6                      |            |    |    |  |
| median                                                 | 0.0 - 10.5               | 2.0 - 10.5               | 0.0 - 6.5                |            |    |    |  |
| range                                                  |                          |                          |                          |            |    |    |  |
| Esophageal shape, n (%)                                |                          |                          |                          |            |    |    |  |
| Flask                                                  | 61 (67) <sup>ps</sup>    | 34 (68) <sup>ps</sup>    | 27 (66) <sup>ps</sup>    | NS         | NS | NS |  |
| Spindle                                                | 19 (21) <sup>ps</sup>    | 9 (18) <sup>ps</sup>     | 10 (24) <sup>ps</sup>    | NS         | NS | NS |  |
| Sigmoid                                                | 11 (12) <sup>ps</sup>    | 7 (14) <sup>ps</sup>     | 4 (10) <sup>ps</sup>     | NS         | NS | NS |  |
| Degree esophageal dilatation                           |                          |                          |                          |            |    |    |  |
| First degree <sup>†</sup> ; n, (%)                     | 23 (25) <sup>ps</sup>    | 13 (26) <sup>ps</sup>    | 10 (24)                  | NS         | NS | NS |  |
| Second degree <sup>†</sup> ; n, (%)                    | 48 (53) <sup>ps</sup>    | 27 (54) <sup>ps</sup>    | 21 (51)                  | NS         | NS | NS |  |
| Third degree <sup>†</sup> ; n, (%)                     | 17 (19) <sup>ps</sup>    | 11 (22) <sup>ps</sup>    | 6 (15)                   | NS         | NS | NS |  |
| <b>High-Resolution Manometry</b>                       |                          |                          |                          |            |    |    |  |
| Basal LES pressure (mmHg),                             | 12.8 ± 7.7               | 14.8 ± 8.8               | 10.5 ± 5.3               | 0.123      |    |    |  |
| mean ± SD                                              | 11.3                     | 13.0                     | 11.1                     |            |    |    |  |
| median                                                 | 0 - 39.2                 | 0.1 - 39.2               | 0.0 - 20.8               |            |    |    |  |
| range                                                  |                          |                          |                          |            |    |    |  |
| Integrated relaxation pressure (IRP) (mmHg), mean ± SD | 7.9 ± 4.5                | 8.6 ± 4.9                | 7.0 ± 3.9                | 0.664      |    |    |  |

|                                |           |              |             |              |       |    |       |
|--------------------------------|-----------|--------------|-------------|--------------|-------|----|-------|
|                                | median    | 7.8          | 7.6         | 7.8          |       |    |       |
|                                | range     | 0.0 - 23.3   | 1.2 - 23.3  | 0.0 - 13.6   |       |    |       |
| IRP > 15 mmHg; n, (%)          |           | 4 (4)        | 4 (8)       | 0 (0)        | NS    | NS | NS    |
| Amplitude distal contractions, |           |              |             |              |       |    |       |
|                                | mean ± SD | 16.6 ± 32.7  | 19.0 ±      | 13.9 ± 27.3  | 0.931 |    |       |
|                                | median    | 0.0          | 36.9        | 0.0          |       |    |       |
|                                | range     | 0.0 - 201.5  | 0.0         | 0.0 - 130.7  |       |    |       |
|                                |           |              | 0.0 - 201.0 |              |       |    |       |
| Distal contractile integral    |           | 235.3 ±      | 308.9 ±     | 152.0 ±      | 0.995 |    |       |
| (mmHg/s/cm), mean ± SD         |           | 923.5        | 1197.7      | 450.0        |       |    |       |
|                                | median    | 0.0          | 0.0         | 0.0          |       |    |       |
|                                | range     | 0.0 - 7750   | 0.0 - 7750  | 0.0 - 2188.7 |       |    |       |
| DeMeester score > 14.72; n,    |           | 13 (14)      | 7 (14)      | 6 (15)       | NS    | NS | NS    |
| (%)                            |           |              |             |              |       |    |       |
| DeMeester score > 14.72, mean  |           | 34.3 ± 24.6  | 21.8 ± 4.3  | 45.5 ± 29.6  | NS    | NS | 0.044 |
| ± SD                           |           | 23.7         | 21.7        | 34.1         |       |    |       |
|                                | median    | 16.1 - 109.0 | 16.1 - 28.9 | 22.0 - 109.0 |       |    |       |
|                                | range     |              |             |              |       |    |       |

Numbers may not sum to totals due to missing data, and column percentages may not sum to 100% due to rounding.

BMI: body mass index; cm: centimeter; DCI: distal; contractile integral; HRM: High-resolution manometry; IRP: Integrated relaxation pressure; Kg: kilogram; LES: Lower; esophageal sphincter; min: minute; mmHg: millimeters of mercury; NS: Not significant; ps: pre-surgery; s: second; SD: standard deviation; w/o: without, w/o CP: without chest pain; w/CP: with chest pain. †: First degree of dilatation (< 3.5 cm), second degree (≥ 3.5 < 6 cm), third-degree (≥ 6).

**Supplementary Table 3.** Characteristics of the study population according to chest pain at twelve-months post-surgery.

|                                       | <b>Total<br/>(n=66)</b> | <b>W/O<br/>Chest Pain<br/>(n=37)</b> | <b>With Chest<br/>Pain<br/>(n=29)</b> | <b>P-value<br/>Total vs.<br/>w/o CP</b> | <b>P-value<br/>Total vs.<br/>w/CP</b> | <b>P-value<br/>w/o vs.<br/>w/CP</b> |
|---------------------------------------|-------------------------|--------------------------------------|---------------------------------------|-----------------------------------------|---------------------------------------|-------------------------------------|
| <b>Demographics</b>                   |                         |                                      |                                       |                                         |                                       |                                     |
| Age (years), mean ± SD                | 40.7 ±                  | 40.7 ±                               | 42.4 ±                                | 0.915                                   |                                       |                                     |
| median                                | 14.6 <sup>ps</sup>      | 14.9 <sup>ps</sup>                   | 14.9 <sup>ps</sup>                    |                                         |                                       |                                     |
| range                                 | 39.0                    | 40.0                                 | 41.0                                  |                                         |                                       |                                     |
|                                       | 18 - 78                 | 18 - 68                              | 19 - 78                               |                                         |                                       |                                     |
| Sex: female; n,<br>(%)/male; n, (%)   | 37 (56) /<br>29 (44)    | 18 (49) /<br>19 (51)                 | 19 (66) / 10<br>(34)                  |                                         |                                       |                                     |
| Ratio F/M                             | 1.28                    | 0.95                                 | 1.94                                  |                                         |                                       |                                     |
| <b>Clinical variables</b>             |                         |                                      |                                       |                                         |                                       |                                     |
| BMI (Kg/m <sup>2</sup> ), mean ± SD   | 26.8 ± 6.1              | 28.0 ± 6.7                           | 25.0 ± 4.8                            | 0.349                                   |                                       |                                     |
| median                                | 26.4                    | 28.0                                 | 24.8                                  |                                         |                                       |                                     |
| range                                 | 19.0 - 46.8             | 19.0 - 46.8                          | 20.2 - 35.5                           |                                         |                                       |                                     |
| Overweight; n, (%)                    | 10 (15)                 | 7 (19)                               | 3 (10)                                | NS                                      | NS                                    | NS                                  |
| Obesity; n, (%)                       | 6 (9)                   | 4 (11)                               | 2 (7)                                 | NS                                      | NS                                    | NS                                  |
| Autoimmune disease; n,<br>(%)         | 6 (9) <sup>ps</sup>     | 3 (8) <sup>ps</sup>                  | 3 (10) <sup>ps</sup>                  | NS                                      | NS                                    | NS                                  |
| Inflammatory diseases; n,<br>(%)      | 6 (9) <sup>ps</sup>     | 2 (5) <sup>ps</sup>                  | 4 (19) <sup>ps</sup>                  | NS                                      | NS                                    | NS                                  |
| <b>Type of Achalasia</b>              |                         |                                      |                                       |                                         |                                       |                                     |
| I; n, (%)                             | 16 (24)                 | 8 (22)                               | 8 (28)                                | NS                                      | NS                                    | NS                                  |
| II; n, (%)                            | 48 (73)                 | 27 (73)                              | 21 (72)                               | NS                                      | NS                                    | NS                                  |
| III; n, (%)                           | 2 (3)                   | 2 (5)                                | 0 (0)                                 | NS                                      | NS                                    | NS                                  |
| <b>Disease evolution<br/>(Months)</b> |                         |                                      |                                       |                                         |                                       |                                     |
| mean ± SD                             | 25.2 ±                  | 24.6 ± 22.6                          | 25.9 ± 16.0                           | NS                                      | NS                                    | 0.004                               |
| median                                | 24.4 <sup>ps</sup>      | <sup>ps</sup>                        | <sup>ps</sup>                         |                                         |                                       |                                     |
| range                                 | 1 - 108                 | 2 - 108                              | 1 - 96                                |                                         |                                       |                                     |
| <b>Symptoms</b>                       |                         |                                      |                                       |                                         |                                       |                                     |
| Chest pain; n, (%)                    | 29 (44)                 | 0 (0)                                | 29 (100)                              | <0.00001                                | <0.00001                              | <0.00001                            |
| Dysphagia; n, (%)                     | 36 (55)                 | 14 (38)                              | 19 (66)                               | 0.15                                    | 0.3717                                | 0.0464                              |
| <b>Questionnaires</b>                 |                         |                                      |                                       |                                         |                                       |                                     |
| Eckart (score), mean ± SD             | 1.5 ± 1.6               | 0.8 ± 1.3                            | 2.3 ± 1.7                             | <0.050                                  | <0.050                                | <0.001                              |
| median                                | 1.0                     | 1.0                                  | 2.0                                   |                                         |                                       |                                     |
| range                                 | 0 - 7                   | 0 - 6                                | 0 - 7                                 |                                         |                                       |                                     |
| GERD-HRQL (score), mean<br>± SD       | 4.8 ± 6.2               | 3.9 ± 5.2                            | 6.0 ± 7.2                             | 0.150                                   |                                       |                                     |
| median                                | 3.0                     | 2.0                                  | 4.0                                   |                                         |                                       |                                     |
| range                                 | 0.0 - 35.0              | 0.0 - 25.0                           | 0.0 - 35.0                            |                                         |                                       |                                     |



|                                              |                          |                          |                          |        |        |        |
|----------------------------------------------|--------------------------|--------------------------|--------------------------|--------|--------|--------|
| EAT-10 (score), mean ± SD                    | 2.8 ± 4.9                | 2.2 ± 4.1                | 3.7 ± 5.6                | 0.072  |        |        |
| median                                       | 1.0                      | 0.0                      | 2.0                      |        |        |        |
| range                                        | 0.0 - 29.0               | 0.0 - 21.0               | 0.0 - 29.0               |        |        |        |
| <b>Viral exanthemata's childhood disease</b> |                          |                          |                          |        |        |        |
| Chickenpox; n, (%)                           | 52 (79) <sup>ps</sup>    | 31 (84) <sup>ps</sup>    | 21 (72) <sup>ps</sup>    | NS     | NS     | NS     |
| Measles; n, (%)                              | 25 (38) <sup>ps</sup>    | 12 (38) <sup>ps</sup>    | 13 (45) <sup>ps</sup>    | NS     | NS     | NS     |
| Rubella; n, (%)                              | 6 (9) <sup>ps</sup>      | 0 (0) <sup>ps</sup>      | 6 (21) <sup>ps</sup>     | 0.0853 | 0.1771 | 0.0052 |
| Hepatitis; n, (%)                            | 1 (2) <sup>ps</sup>      | 0 (0) <sup>ps</sup>      | 1 (3) <sup>ps</sup>      | NS     | NS     | NS     |
| Mumps; n, (%)                                | 9 (14) <sup>ps</sup>     | 6 (16) <sup>ps</sup>     | 3 (10) <sup>ps</sup>     | NS     | NS     | NS     |
| <b>Environmental exposure</b>                |                          |                          |                          |        |        |        |
| Tobacco exposure; n, (%)                     | 22 (33) <sup>ps</sup>    | 14 (38) <sup>ps</sup>    | 8 (28) <sup>ps</sup>     | NS     | NS     | NS     |
| Biomass exposure; n, (%)                     | 18 (27) <sup>ps</sup>    | 9 (27) <sup>ps</sup>     | 9 (31) <sup>ps</sup>     | NS     | NS     | NS     |
| <b>Laboratory Data</b>                       |                          |                          |                          |        |        |        |
| Anti-nuclear antibodies; n, (%)              | 25/61 (41) <sup>ps</sup> | 15/34 (44) <sup>ps</sup> | 10/26 (38) <sup>ps</sup> | NS     | NS     | NS     |
| Neutrophil to lymphocyte ratio mean±SD       | 2.0 ± 0.9 <sup>ps</sup>  | 2.0 ± 0.9 <sup>ps</sup>  | 2.0 ± 0.9 <sup>ps</sup>  | 0.975  |        |        |
| median                                       | 1.9                      | 1.9                      | 1.8                      |        |        |        |
| range                                        | 0.6 - 4.8                | 0.6 - 4.8                | 1.1 - 4.5                |        |        |        |
| <b>Previous Treatments</b>                   |                          |                          |                          |        |        |        |
| Pneumatic dilation; n, (%)                   | 44 (67) <sup>ps</sup>    | 26 (70) <sup>ps</sup>    | 18 (62) <sup>ps</sup>    | NS     | NS     | NS     |
| Pneumatic dilation sessions, mean±SD         | 1.2 ± 0.6 <sup>ps</sup>  | 1.3 ± 0.7 <sup>ps</sup>  | 1.0 ± 0.0 <sup>ps</sup>  | NS     | NS     | NS     |
| median                                       | 1 - 3                    | 1 - 3                    | 1 - 1                    |        |        |        |
| range                                        |                          |                          |                          |        |        |        |
| <b>Diagnostic studies</b>                    |                          |                          |                          |        |        |        |
| <b>    Barium swallow</b>                    |                          |                          |                          |        |        |        |
| Esophageal dilatation (cm), mean ± SD        | 4.4 ± 1.7 <sup>ps</sup>  | 4.6 ± 1.8 <sup>ps</sup>  | 4.2 ± 1.5 <sup>ps</sup>  | 0.776  |        |        |
| median                                       | 4.3                      | 4.4                      | 4.1                      |        |        |        |
| range                                        | 0.0 - 10.5               | 0.0 - 10.5               | 0.0 - 7.5                |        |        |        |
| Esophageal shape, n (%)                      | 48 (73) <sup>ps</sup>    | 25 (67) <sup>ps</sup>    | 23 (79) <sup>ps</sup>    | NS     | NS     | NS     |
| Flask                                        | 10 (15) <sup>ps</sup>    | 5 (14) <sup>ps</sup>     | 5 (17) <sup>ps</sup>     | NS     | NS     | NS     |
| Spindle                                      | 8 (12) <sup>ps</sup>     | 7 (19) <sup>ps</sup>     | 1 (4) <sup>ps</sup>      | NS     | NS     | NS     |
| Sigmoid                                      |                          |                          |                          |        |        |        |
| Degree esophageal dilatation                 |                          |                          |                          |        |        |        |
| First degree <sup>†</sup> ; n, (%)           | 13 (21) <sup>ps</sup>    | 7 (21) <sup>ps</sup>     | 6 (21)                   | NS     | NS     | NS     |
| Second degree <sup>†</sup> ; n, (%)          | 39 (64) <sup>ps</sup>    | 21 (62) <sup>ps</sup>    | 18 (62)                  | NS     | NS     | NS     |
| Third degree <sup>†</sup> ; n, (%)           | 9 (15) <sup>ps</sup>     | 6 (18) <sup>ps</sup>     | 3 (10)                   | NS     | NS     | NS     |
| <b>    High-Resolution Manometry</b>         |                          |                          |                          |        |        |        |

|                                                        |             |            |             |       |    |    |
|--------------------------------------------------------|-------------|------------|-------------|-------|----|----|
| Basal LES pressure (mmHg), mean ± SD                   | 8.0 ± 5.4   | 9.8 ± 6.2  | 5.6 ± 3.7   | 0.606 |    |    |
| median                                                 | 5.8         | 9.3        | 4.2         |       |    |    |
| range                                                  | 2.8 - 17.1  | 3.6 - 17.1 | 2.8 - 9.8   |       |    |    |
| Integrated relaxation pressure (IRP) (mmHg), mean ± SD | 5.2 ± 3.0   | 4.9 ± 3.5  | 5.7 ± 2.8   | 0.883 |    |    |
| median                                                 | 6.5         | 4.8        | 6.5         |       |    |    |
| range                                                  | 1.8 - 8.0   | 1.8 - 8.0  | 2.5 - 8.0   |       |    |    |
| IRP > 15 mmHg; n, (%)                                  | 0 (0)       | 0 (0)      | 0 (0)       | NS    | NS | NS |
| DeMeester score > 14.72; n, (%)                        | 3 (5)       | 1 (3)      | 2 (7)       | NS    | NS | NS |
| DeMeester score > 14.72, mean ± SD                     | 36.3 ± 25.0 | 15.8       | 46.6 ± 24.8 | 0.388 |    |    |
| median                                                 | 29.1        |            | 29.1 - 64.1 |       |    |    |
| range                                                  | 15.8 - 64.1 |            |             |       |    |    |

Numbers may not sum to totals due to missing data, and column percentages may not sum to 100% due to rounding.

BMI: body mass index; cm: centimeter; DCI: distal; contractile integral; HRM: High-resolution manometry; IRP: Integrated relaxation pressure; Kg: kilogram; LES: Lower; esophageal sphincter; min: minute; mmHg: millimeters of mercury; NS: Not significant; ps: pre-surgery; s: second; SD: standard deviation; w/o: without, w/o CP: without chest pain; w/CP: with chest pain. †: First degree of dilatation (< 3.5 cm), second degree (≥ 3.5 < 6 cm), third-degree (≥ 6).

**Supplementary Table 4.** Characteristics of the study population according to chest pain at twenty-four months post-surgery.

|                                     | <b>Total<br/>(n=60)</b> | <b>W/O Chest<br/>Pain<br/>(n=32)</b> | <b>With Chest<br/>Pain<br/>(n=28)</b> | <b>P-value<br/>Total vs.<br/>w/o CP</b> | <b>P-value<br/>Total vs.<br/>w/CP</b> | <b>P-value<br/>w/o vs.<br/>w/CP</b> |
|-------------------------------------|-------------------------|--------------------------------------|---------------------------------------|-----------------------------------------|---------------------------------------|-------------------------------------|
| <b>Demographics</b>                 |                         |                                      |                                       |                                         |                                       |                                     |
| Age (years), mean ± SD              | 42.4 ±                  | 42.4 ±                               | 42.3 ±                                | 0.970                                   |                                       |                                     |
| median                              | 14.6 <sup>ps</sup>      | 14.0 <sup>ps</sup>                   | 15.4 <sup>ps</sup>                    |                                         |                                       |                                     |
| range                               | 41.0                    | 41.5                                 | 39.5                                  |                                         |                                       |                                     |
|                                     | 18 - 78                 | 18 - 68                              | 18 - 78                               |                                         |                                       |                                     |
| Sex: female; n,                     | 38 (63) /               | 20 (63) / 12                         | 18 (64) / 10                          | NS                                      | NS                                    | NS                                  |
| (%)/male; n, (%)                    | 22 (37)                 | (37)                                 | (36)                                  |                                         |                                       |                                     |
| Ratio F/M                           | 1.73                    | 1.67                                 | 1.80                                  |                                         |                                       |                                     |
| <b>Clinical variables</b>           |                         |                                      |                                       |                                         |                                       |                                     |
| BMI (Kg/m <sup>2</sup> ), mean ± SD | 27.3 ± 6.0              | 27.8 ± 6.6                           | 26.7 ± 5.6                            | 0.987                                   |                                       |                                     |
| median                              | 26.0                    | 26.0                                 | 26.3                                  |                                         |                                       |                                     |
| range                               | 16.7 - 48.2             | 18.9 - 48.2                          | 16.7 - 39.1                           |                                         |                                       |                                     |
| Overweight; n, (%)                  | 13 (22)                 | 7 (22)                               | 6 (21)                                | NS                                      | NS                                    | NS                                  |
| Obesity; n, (%)                     | 7 (11)                  | 3 (9)                                | 4 (14)                                | NS                                      | NS                                    | NS                                  |
| Autoimmune disease; n, (%)          | 6 (10) <sup>ps</sup>    | 4 (12) <sup>ps</sup>                 | 2 (7) <sup>ps</sup>                   | NS                                      | NS                                    | NS                                  |
| Inflammatory diseases; n, (%)       | 12 (20) <sup>ps</sup>   | 7 (22) <sup>ps</sup>                 | 5 (18) <sup>ps</sup>                  | NS                                      | NS                                    | NS                                  |
| <b>Type of Achalasia</b>            |                         |                                      |                                       |                                         |                                       |                                     |
| I; n, (%)                           | 17 (28)                 | 11 (35)                              | 6 (21)                                | NS                                      | NS                                    | NS                                  |
| II; n, (%)                          | 41 (69)                 | 19 (59)                              | 22 (79)                               | NS                                      | NS                                    | NS                                  |
| III; n, (%)                         | 2 (3)                   | 2 (6)                                | 0 (0)                                 | NS                                      | NS                                    | NS                                  |
| <b>Disease evolution (Months)</b>   |                         |                                      |                                       |                                         |                                       |                                     |
| mean ± SD                           | 25.4 ±                  | 24.1 ± 20.2                          | 26.9 ± 28.6                           | 0.959                                   |                                       |                                     |
| median                              | 24.2 <sup>ps</sup>      | <sup>ps</sup>                        | <sup>ps</sup>                         |                                         |                                       |                                     |
| range                               | 15.0                    | 18.0                                 | 13.0                                  |                                         |                                       |                                     |
|                                     | 2 - 108                 | 3 - 82                               | 2 - 108                               |                                         |                                       |                                     |
| <b>Symptoms</b>                     |                         |                                      |                                       |                                         |                                       |                                     |
| Chest pain; n, (%)                  | 28 (47)                 | 0 (0)                                | 28 (100)                              | <.000001                                | <.000001                              | <.000001                            |
| Dysphagia; n, (%)                   | 28 (47)                 | 11 (34)                              | 17 (61)                               | NS                                      | NS                                    | NS                                  |
| <b>Questionnaires</b>               |                         |                                      |                                       |                                         |                                       |                                     |
| Eckart (score), mean ± SD           | 1.9 ± 1.8               | 0.9 ± 1.2                            | 3.0 ± 1.8                             | 0.002                                   | <0.001                                | <0.001                              |
| median                              | 1.5                     | 1.0                                  | 3.0                                   |                                         |                                       |                                     |
| range                               | 0 - 9                   | 0 - 6                                | 1 - 9                                 |                                         |                                       |                                     |
| GERD-HRQL (score), mean ±           | 5.8 ± 6.0               | 4.5 ± 6.9                            | 7.2 ± 4.3                             | NS                                      | NS                                    | 0.003                               |
| SD                                  | 4.0                     | 2.0                                  | 6.0                                   |                                         |                                       |                                     |
| median                              | 0.0 - 30.0              | 0.0 - 30.0                           | 2.0 - 16.0                            |                                         |                                       |                                     |
| range                               |                         |                                      |                                       |                                         |                                       |                                     |
| EAT-10 (score), mean ± SD           | 3.8 ± 5.0               | 2.6 ± 4.9                            | 5.1 ± 4.7                             | NS                                      | NS                                    | 0.011                               |
| median                              | 1.5                     | 1.0                                  | 3.0                                   |                                         |                                       |                                     |

|                                              | range | 0.0 - 23.0               | 0.0 - 23.0               | 0.0 - 16.0              |       |    |    |
|----------------------------------------------|-------|--------------------------|--------------------------|-------------------------|-------|----|----|
| <b>Viral exanthemata's childhood disease</b> |       |                          |                          |                         |       |    |    |
| Chickenpox; n, (%)                           |       | 47 (78) <sup>ps</sup>    | 26 (81) <sup>ps</sup>    | 21 (75) <sup>ps</sup>   | NS    | NS | NS |
| Measles; n, (%)                              |       | 26 (43) <sup>ps</sup>    | 12 (38) <sup>ps</sup>    | 14 (50) <sup>ps</sup>   | NS    | NS | NS |
| Rubella; n, (%)                              |       | 7 (12) <sup>ps</sup>     | 2 (6) <sup>ps</sup>      | 5 (18) <sup>ps</sup>    | NS    | NS | NS |
| Hepatitis; n, (%)                            |       | 1 (2) <sup>ps</sup>      | 0 (0) <sup>ps</sup>      | 1 (4) <sup>ps</sup>     | NS    | NS | NS |
| Mumps; n, (%)                                |       | 8 (13) <sup>ps</sup>     | 6 (19) <sup>ps</sup>     | 2 (7) <sup>ps</sup>     | NS    | NS | NS |
| <b>Environmental exposure</b>                |       |                          |                          |                         |       |    |    |
| Tobacco exposure; n, (%)                     |       | 19 (32) <sup>ps</sup>    | 10 (31) <sup>ps</sup>    | 9 (32) <sup>ps</sup>    | NS    | NS | NS |
| Biomass exposure; n, (%)                     |       | 16 (27) <sup>ps</sup>    | 9 (28) <sup>ps</sup>     | 7 (25) <sup>ps</sup>    | NS    | NS | NS |
| <b>Laboratory Data</b>                       |       |                          |                          |                         |       |    |    |
| Anti-nuclear antibodies; (%)                 |       | 21/57 (37) <sup>ps</sup> | 12/31 (39) <sup>ps</sup> | 9/27 (33) <sup>ps</sup> | NS    | NS | NS |
| Neutrophil to lymphocyte ratio mean±SD       |       | 2.3 ± 1.4 <sup>ps</sup>  | 2.0 ± 0.9 <sup>ps</sup>  | 2.7 ± 1.7 <sup>ps</sup> | 0.391 |    |    |
| median                                       |       | 2.0                      | 1.9                      | 2.2                     |       |    |    |
| range                                        |       | 0.6 - 7.7                | 0.6 - 4.8                | 1.1 - 7.7               |       |    |    |
| <b>Previous Treatments</b>                   |       |                          |                          |                         |       |    |    |
| Pneumatic dilation; n, (%)                   |       | 44 (73) <sup>ps</sup>    | 23 (72) <sup>ps</sup>    | 21 (75) <sup>ps</sup>   | NS    | NS | NS |
| Pneumatic dilation sessions, mean ± SD       |       | 1.2 ± 0.6 <sup>ps</sup>  | 1.2 ± 0.7 <sup>ps</sup>  | 1.3 ± 0.5 <sup>ps</sup> | NS    | NS | NS |
| median                                       |       | 1.0                      | 1.0                      | 1.0                     |       |    |    |
| range                                        |       | 1 - 3                    | 1 - 3                    | 1 - 2                   |       |    |    |
| <b>Diagnostic studies</b>                    |       |                          |                          |                         |       |    |    |
| <b>Barium swallow</b>                        |       |                          |                          |                         |       |    |    |
| Esophageal dilatation (cm), mean ± SD        |       | 4.5 ± 1.7 <sup>ps</sup>  | 4.4 ± 1.9 <sup>ps</sup>  | 4.5 ± 1.4 <sup>ps</sup> | 0.780 |    |    |
| median                                       |       | 4.4                      | 4.1                      | 4.5                     |       |    |    |
| range                                        |       | 0.0 - 10.5               | 0.0 - 10.5               | 0.0 - 7.5               |       |    |    |
| Esophageal shape, n (%)                      |       |                          |                          |                         |       |    |    |
| Flask                                        |       | 42 (70) <sup>ps</sup>    | 20 (63) <sup>ps</sup>    | 22 (79) <sup>ps</sup>   | NS    | NS | NS |
| Spindle                                      |       | 12 (17) <sup>ps</sup>    | 8 (24) <sup>ps</sup>     | 4 (17) <sup>ps</sup>    | NS    | NS | NS |
| Sigmoid                                      |       | 6 (13) <sup>ps</sup>     | 4 (13) <sup>ps</sup>     | 2 (4) <sup>ps</sup>     | NS    | NS | NS |
| Degree esophageal dilatation                 |       |                          |                          |                         |       |    |    |
| First degree <sup>†</sup> ; n, (%)           |       | 11 (21) <sup>ps</sup>    | 7 (26) <sup>ps</sup>     | 4 (14)                  | NS    | NS | NS |
| Second degree <sup>†</sup> ; n, (%)          |       | 33 (63) <sup>ps</sup>    | 16 (59) <sup>ps</sup>    | 17 (61)                 | NS    | NS | NS |
| Third degree <sup>†</sup> ; n, (%)           |       | 8 (15) <sup>ps</sup>     | 4 (15) <sup>ps</sup>     | 4 (14)                  | NS    | NS | NS |
| <b>High-Resolution Manometry</b>             |       |                          |                          |                         |       |    |    |
| Basal LES pressure (mmHg), mean ± SD         |       | 12.1 ± 6.1               | 13.5 ± 6.4               | 10.7 ± 5.5              | 0.968 |    |    |
| median                                       |       | 10.8                     | 13.3                     | 9.8                     |       |    |    |
| range                                        |       | 2.2 - 24.7               | 2.6 - 24.7               | 2.2 - 21.0              |       |    |    |

|                                                    |             |              |             |       |    |    |
|----------------------------------------------------|-------------|--------------|-------------|-------|----|----|
| Integrated relaxation pressure (IRP) (mmHg), mean  | 7.6 ± 3.8   | 7.9 ± 3.6    | 7.4 ± 4.1   | 0.999 |    |    |
| ± SD                                               | 7.2         | 8.4          | 6.2         |       |    |    |
| median                                             | 1.0 - 14.00 | 1.0 - 13.6   | 1.4 - 14.0  |       |    |    |
| range                                              |             |              |             |       |    |    |
| IRP > 15 mmHg; n, (%)                              | 0 (0)       | 0 (0)        | 0 (0)       | NS    | NS | NS |
| Amplitude distal contractions, mean ± SD           | 9.7 ± 18.5  | 13.6 ± 22.3  | 5.7 ± 12.8  | 0.905 |    |    |
| median                                             | 0.0         | 0.0          | 0.0         |       |    |    |
| range                                              | 0.0 - 82.0  | 0.0 - 82.0   | 0.0 - 36.7  |       |    |    |
| Distal contractile integral (mmHg/s/cm), mean ± SD | 128.4 ±     | 190.8 ±      | 63.3 ±      | 0.337 |    |    |
| median                                             | 346.1       | 441.3        | 195.6       |       |    |    |
| range                                              | 0.0         | 0.0          | 0.0         |       |    |    |
|                                                    | 0 - 1993.0  | 0.0 - 1993.0 | 0.0 - 910   |       |    |    |
| DeMeester score > 14.72; n, (%)                    | 11 (18)     | 6 (19)       | 5 (18)      | NS    | NS | NS |
| DeMeester score > 14.72, mean ± SD                 | 32.7 ±      | 37.8 ± 20.8  | 26.7 ± 9.8  | 0.571 |    |    |
| median                                             | 17.0        | 34.4         | 23.5        |       |    |    |
| range                                              | 28.2        | 15.5 - 68.6  | 18.0 - 42.9 |       |    |    |
|                                                    | 15.5 - 68.6 |              |             |       |    |    |

Numbers may not sum to totals due to missing data, and column percentages may not sum to 100% due to rounding.

BMI: body mass index; cm: centimeter; DCI: distal; contractile integral; HRM: High-resolution manometry; IRP: Integrated relaxation pressure; Kg: kilogram; LES: Lower; esophageal sphincter; min: minute; mmHg: millimeters of mercury; NS: Not significant; ps: pre-surgery; s: second; SD: standard deviation; w/o: without, w/o CP: without chest pain; w/CP: with chest pain. †: First degree of dilatation (< 3.5 cm), second degree (≥ 3.5 < 6 cm), third-degree (≥ 6).

**Supplementary Table 5.** A multiple linear regression analysis

| R    | R <sup>2</sup> | Adjusted R <sup>2</sup> | Standard error of the estimate |
|------|----------------|-------------------------|--------------------------------|
| 0.95 | 0.89           | 0.79                    | 0.3                            |

**Supplementary Table 6.** ANOVA

| Model      | df | F    | p     |
|------------|----|------|-------|
| Regression | 12 | 8.36 | <.001 |

**Supplementary Table 7.** Coefficients of the multiple linear regression analysis

| Model                         | not standardized Coefficients |       | Standard error | t     | p                |
|-------------------------------|-------------------------------|-------|----------------|-------|------------------|
|                               | B                             | Beta  |                |       |                  |
| (Constant)                    | 1.2                           |       | 0.53           | 2.25  | 0.044            |
| Aye (years)                   | -0.02                         | -0.41 | 0.01           | -3.31 | <b>0.006</b>     |
| Disease evolution (months)    | 0.01                          | 0.22  | 0              | 1.33  | 0.21             |
| BMI (kg/m <sup>2</sup> )      | 0                             | 0.04  | 0.01           | 0.36  | 0.722            |
| GERD-HRQL                     | 0.12                          | 0.9   | 0.05           | 2.48  | <b>0.029</b>     |
| GERD pyrosis                  | -0.18                         | -0.84 | 0.06           | -2.95 | <b>0.012</b>     |
| EAT-10                        | -0.06                         | -0.43 | 0.03           | -2.22 | <b>0.046</b>     |
| ECKARDT                       | 0.52                          | 1.6   | 0.09           | 5.66  | <b>&lt;0.001</b> |
| Dysphagia                     | -0.72                         | -0.95 | 0.2            | -3.64 | <b>0.003</b>     |
| Basal LES pressure (mmHg)     | -0.03                         | -0.22 | 0.02           | -1.48 | 0.164            |
| IRP (mmHg)                    | -0.01                         | -0.08 | 0.03           | -0.46 | 0.652            |
| Amplitude distal contractions | -0.01                         | -0.21 | 0.01           | -0.72 | 0.483            |
| DCI (mmHg/s/cm)               | -0                            | -0.22 | 0              | -0.83 | 0.425            |

BMI: body mass index; cm: centimeter; DCI: distal; contractile integral; HRM: High-resolution manometry; IRP: Integrated relaxation pressure; Kg: kilogram; LES: Lower; esophageal sphincter; min: minute; mmHg: millimeters of mercury; w/o: without, w/o CP: without chest pain; w/CP: with chest pain.
